# Supplementary material
Source: Royal Society of Chemistry journal article supplement (doi:10.1039/d6gc01148a)
Supplement: d6gc01148a1.pdf [file d6gc01148a1.pdf]

## Supporting Information

# Triacetic acid lactone conversion to methylene- $\delta$ -caprolactone: a renewable monomer for bio-based circular polymer synthesis

*Camilo A. Ortega-Vega<sup>†#</sup>, Bowei Liu<sup>‡#</sup>, Francesca D. Eckstrom<sup>§</sup>, Eswara Rao Chokkapu<sup>§</sup>, Eugene Y.-X Chen<sup>§</sup>, Yuriy Román-Leshkov<sup>\*,‡</sup>, Yomaira J. Pagán-Torres<sup>\*,†</sup>*

<sup>†</sup>Department of Chemical Engineering, University of Puerto Rico-Mayaguez, Mayaguez, Puerto Rico, 00680, USA

<sup>‡</sup>Department of Chemical Engineering, Massachusetts Institute of Technology, Cambridge, Massachusetts, 02139, USA

<sup>§</sup>Department of Chemistry, Colorado State University, Fort Collins, Colorado, 80523, USA

<sup>#</sup>These authors contributed equally to this work.

\*Yomaira J. Pagán-Torres, email: yomairaj.pagan@upr.edu

\*Yuriy Román-Leshkov, email: yroman@mit.edu

**Table S1.** Surface area and CO chemisorption of Pt-based catalysts.

| Entry | Catalysts                                          | BET<br>(m <sup>2</sup> /g) | Site density<br>( $\mu\text{mol/g}$ ) | Dispersion | Particle size<br>(nm) |
|-------|----------------------------------------------------|----------------------------|---------------------------------------|------------|-----------------------|
| 1     | 1 wt% Pt/TiO <sub>2</sub>                          | 51.6                       | 10.2                                  | 20%        | 4.6                   |
| 2     | 1 wt% Pt/CeO <sub>2</sub>                          | 163.6                      | 55.2                                  | 107%       | 0.8                   |
| 3     | 1 wt% Pt/ZrO <sub>2</sub>                          | 108.8                      | 34.6                                  | 67.5%      | 1.37                  |
| 4     | 1 wt% Pt/ $\gamma$ -Al <sub>2</sub> O <sub>3</sub> | 214.3                      | 36.6                                  | 71.4%      | 1.30                  |
| 5     | 1 wt% Pt/SiO <sub>2</sub>                          | 128.5                      | 34.3                                  | 66.9%      | 1.38                  |

**Table S2.** Surface area, metal loading, and CO<sub>2</sub> uptake of silica-supported base catalysts.

| Entry | Catalysts                                 | Surface<br>area<br>(m <sup>2</sup> /g) | Metal<br>loading<br>( $\mu\text{mol/g}$ ) | CO <sub>2</sub><br>uptake<br>( $\mu\text{mol/g}$ ) | CO <sub>2</sub> uptake from stepwise TPD<br>( $\mu\text{mol/g}$ ) |                |                |                |
|-------|-------------------------------------------|----------------------------------------|-------------------------------------------|----------------------------------------------------|-------------------------------------------------------------------|----------------|----------------|----------------|
|       |                                           |                                        |                                           |                                                    | 50-<br>150 °C                                                     | 150-<br>250 °C | 250-<br>350 °C | 350-<br>450 °C |
| 1     | SiO <sub>2</sub>                          | 263                                    | -                                         | -                                                  | -                                                                 | -              | -              | -              |
| 2     | 5 wt% CaO/SiO <sub>2</sub>                | 165                                    | 1250                                      | 345                                                | 176                                                               | 88             | 50             | 28             |
| 3     | 5 wt% BaO/SiO <sub>2</sub>                | 182                                    | 364                                       | 259                                                | 135                                                               | 61             | 38             | 24             |
| 4     | 5 wt% Cs <sub>2</sub> O/SiO <sub>2</sub>  | 170                                    | 376                                       | 303                                                | 154                                                               | 64             | 46             | 39             |
| 5     | 15 wt% Cs <sub>2</sub> O/SiO <sub>2</sub> | 84                                     | 1129                                      | 600                                                | 352                                                               | 130            | 71             | 47             |

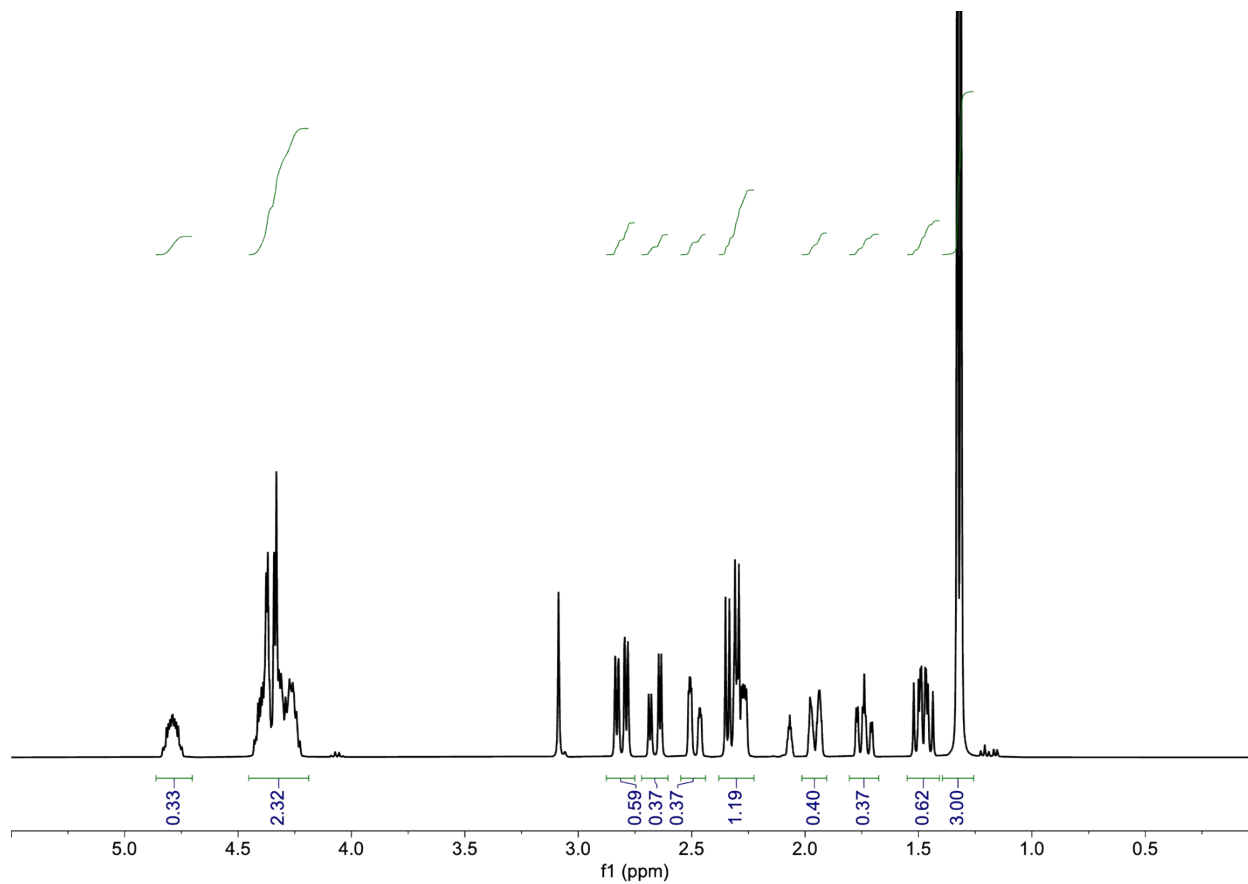

**Fig. S1** <sup>1</sup>H NMR isolated 4-hydroxy-6-methyltetrahydro-2-pyrone (HMTHP) from TAL hydrogenation reaction.

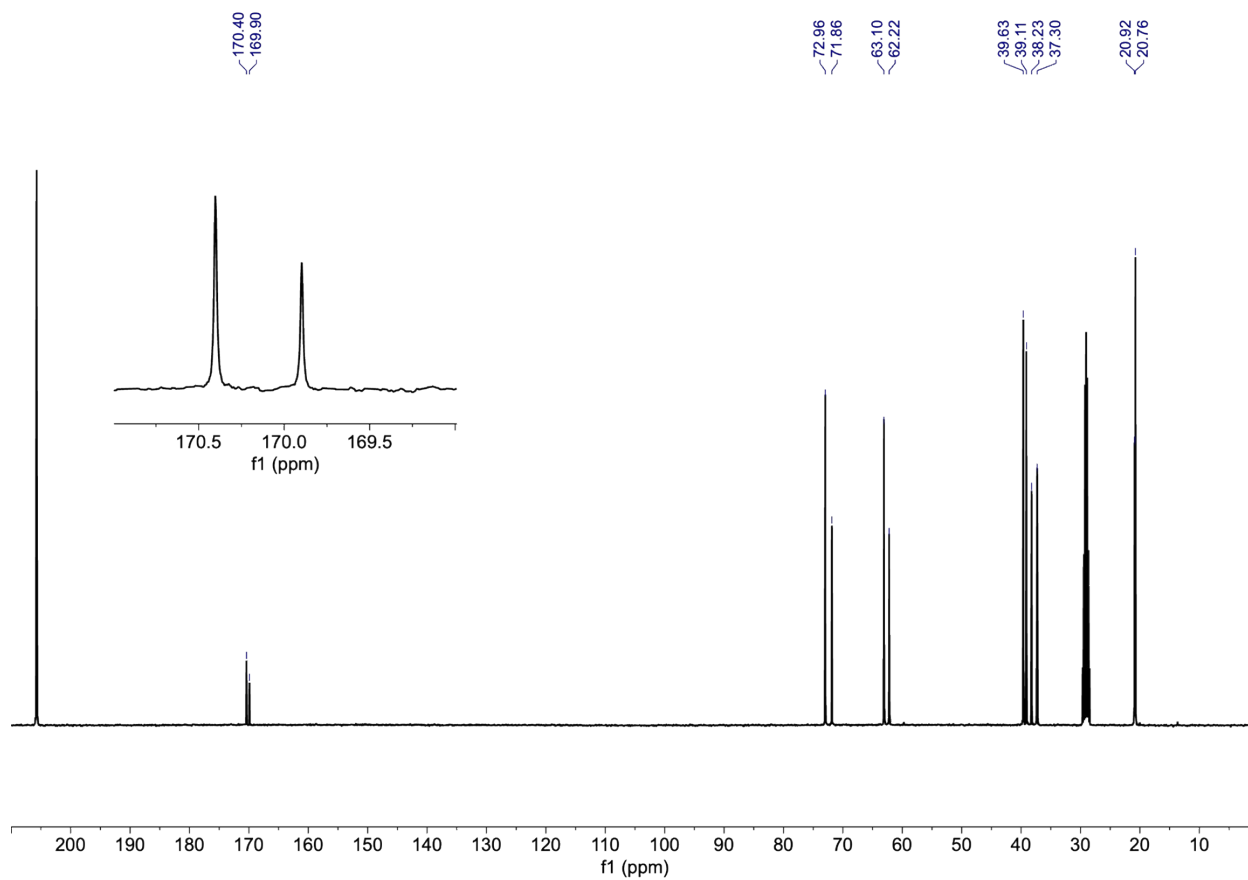

**Fig. S2**  $^{13}\text{C}$  NMR isolated 4-hydroxy-6-methyltetrahydro-2-pyrone (HMTHP) from TAL hydrogenation reaction.

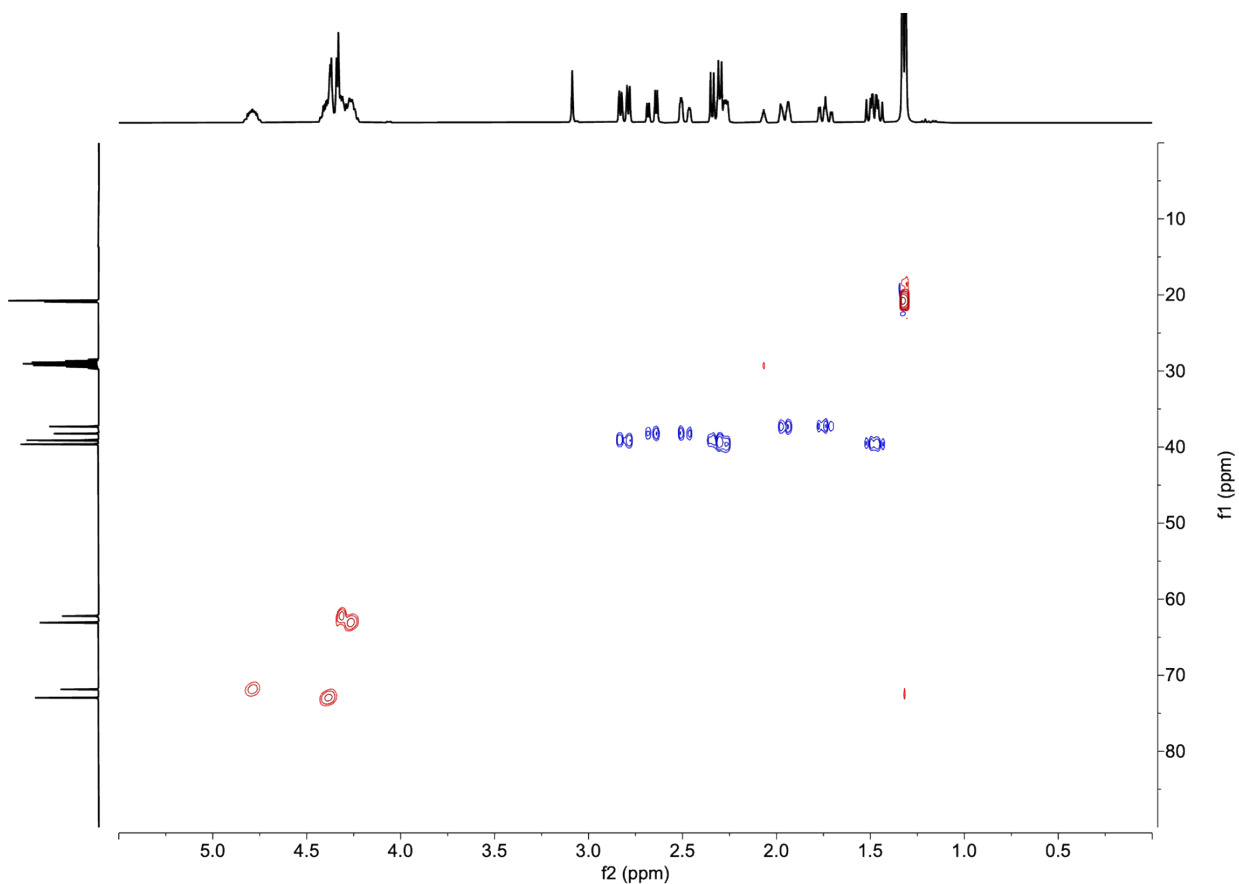

**Fig. S3** HSQC spectra (acetone- $d_6$ ) of isolated 4-hydroxy-6-methyltetrahydro-2-pyrone (HMTHP) from TAL hydrogenation reaction. NMR spectra of HMTHP from TAL hydrogenation are shown in Fig. S1. Two isomeric sets are present, as indicated by paired  $^{13}\text{C}$  resonances (e.g., carbonyl signals at 169.9 and 170.4 ppm). HSQC NMR deconvolution assigns these to the diastereomeric pairs RR/SS and RS/SR. Integration of the  $^1\text{H}$  NMR signals indicates a composition of  $\sim 33\%$  RR/SS ( $\delta$  4.78, m, 1H) and  $\sim 67\%$  RS/SR ( $\delta$  1.48, m, 1H). The diastereomeric pairs then were converted into indistinguishable R/S dCL during the dehydration reaction after removal of the R or S hydroxyl group.

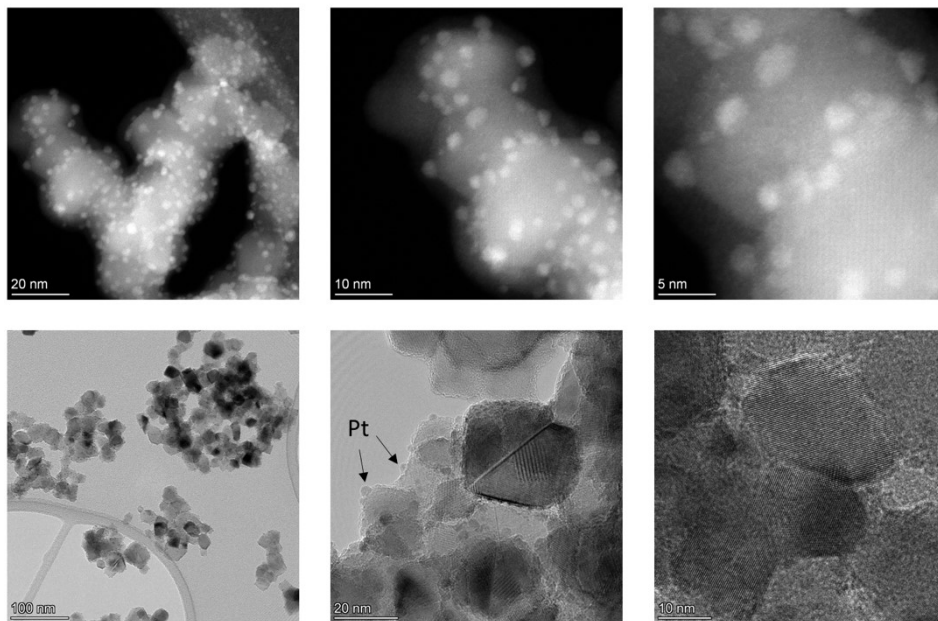

**Fig. S4** HAADF-STEM images of fresh 1 wt% Pt/TiO<sub>2</sub> catalyst.

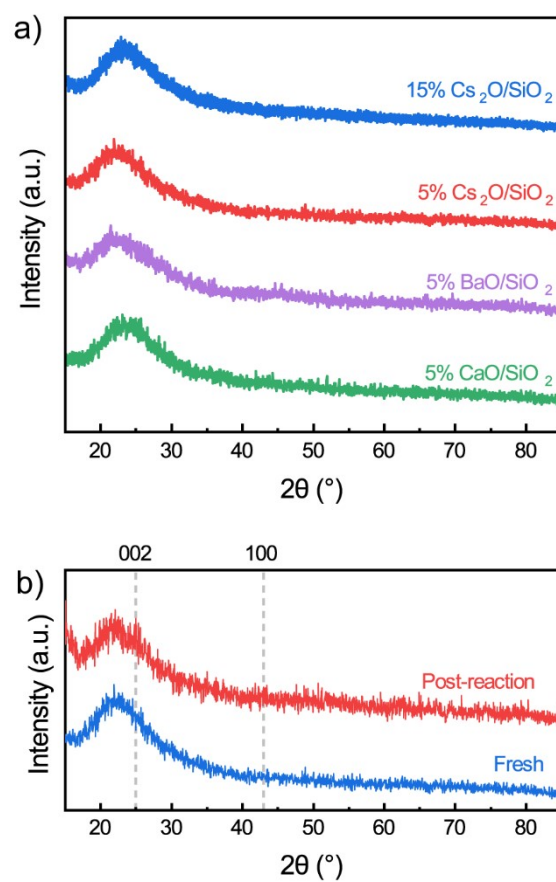

**Fig. S5 a)** XRD patterns of supported metal oxide catalysts. The only observable feature is a broad band near 22° that is attributed to amorphous SiO<sub>2</sub> support. **b)** XRD patterns of 5wt% Cs<sub>2</sub>O/SiO<sub>2</sub> catalyst before and after reaction. Referenced lines represent planes from graphite.

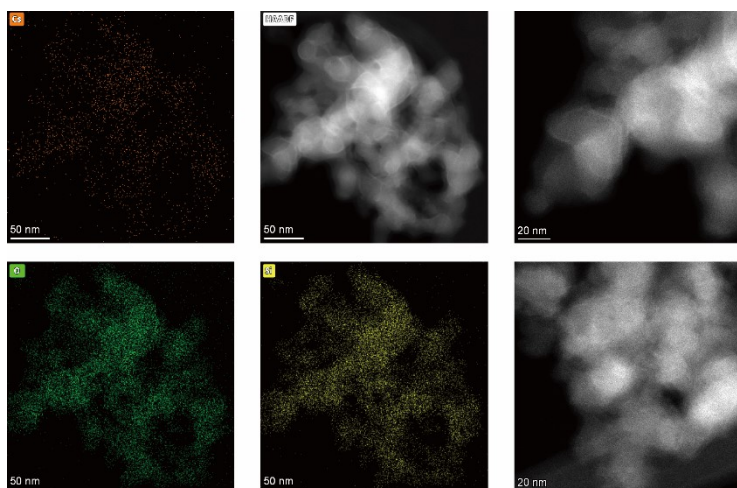

**Fig. S6** STEM-EDS images of fresh 5wt% Cs<sub>2</sub>O/SiO<sub>2</sub> catalyst.

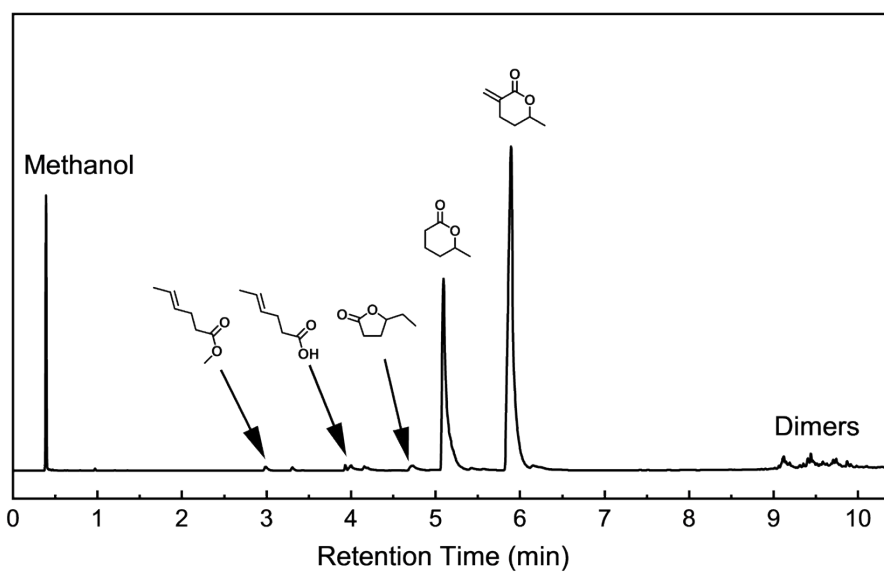

**Fig. S7** Typical GC chromatogram from online gas phase analysis showing the compounds and their retention times.

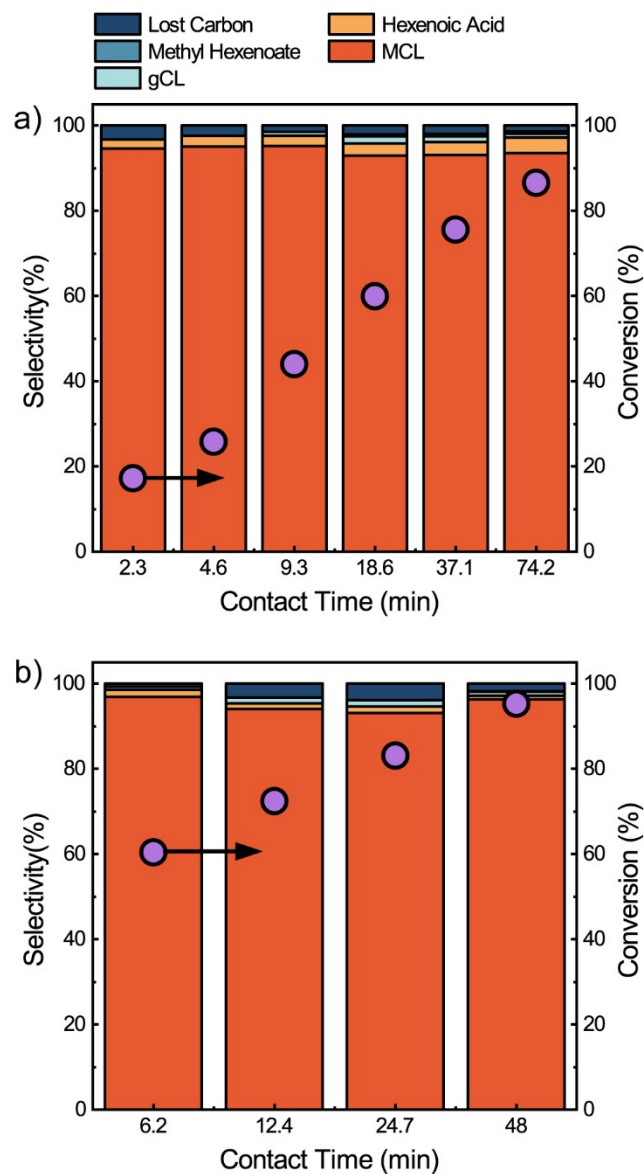

**Fig. S8** Product distribution (bar chart) and dCL conversion (scatter) during the aldol condensation reaction of dCL and formalin over **a)** 5 wt% and **b)** 15 wt% Cs<sub>2</sub>O/SiO<sub>2</sub>. Condition: 0.4 mol% dCL, 1.2 mol% formaldehyde, 220 °C, 1 bar, N<sub>2</sub> balanced.

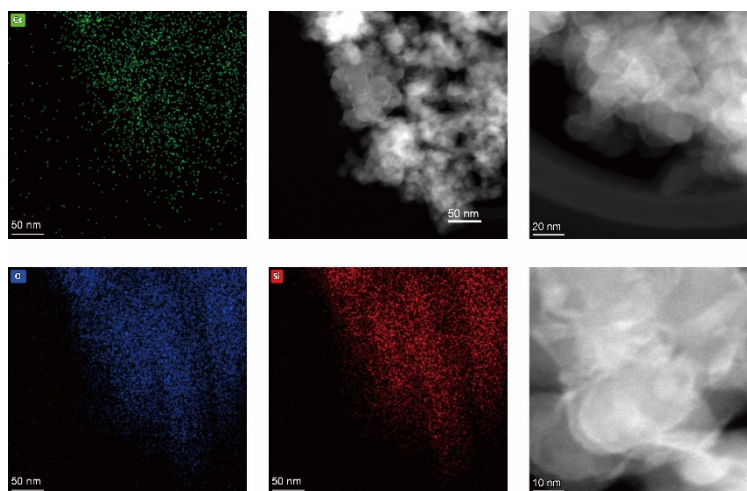

**Fig. S9** STEM-EDS images of fresh 15wt% Cs<sub>2</sub>O/SiO<sub>2</sub> catalyst.

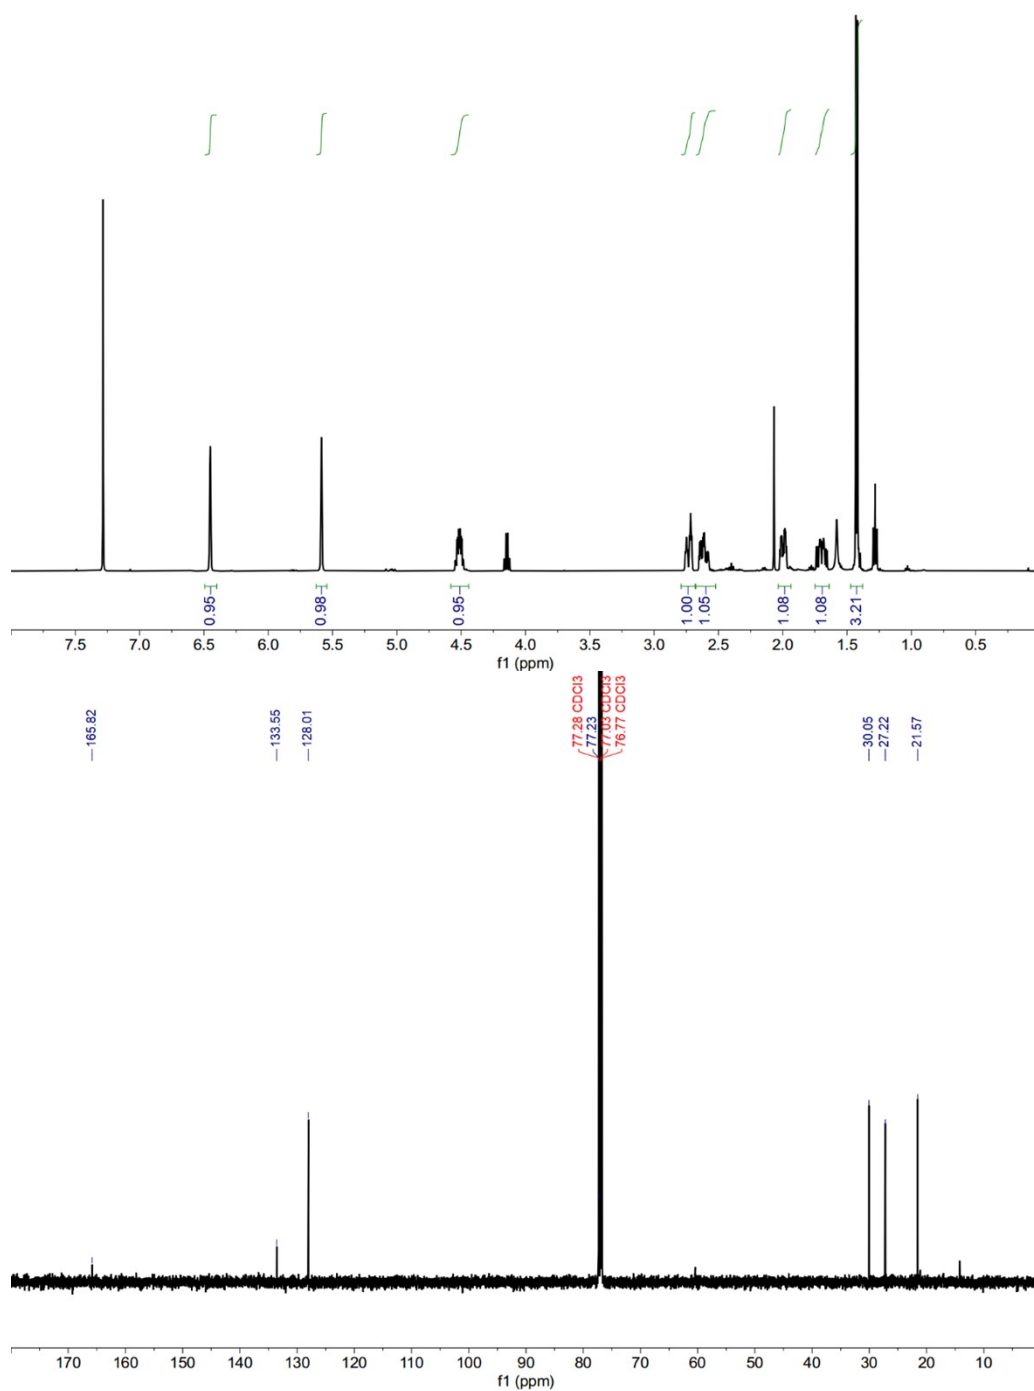

**Fig. S10**  $^1\text{H}$  NMR and  $^{13}\text{C}$  NMR spectra ( $\text{CDCl}_3$ ) of MCL obtained from gas phase aldol condensation reaction via condensing in a bubbler under room temperature.

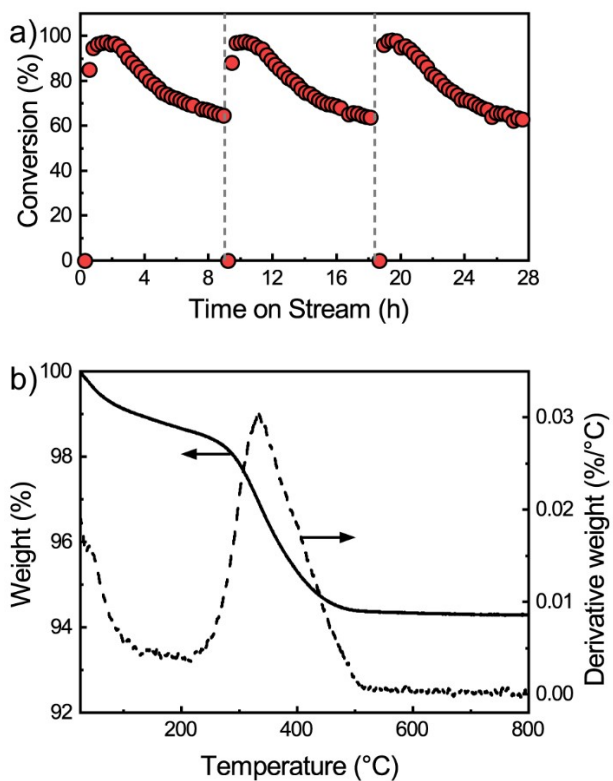

**Fig. S11 a)** dCL conversion as a function of time on stream over 15wt% Cs<sub>2</sub>O/SiO<sub>2</sub>. Condition: 220 °C, contact time = 6 min, 0.4 mol% dCL, 1 bar, N<sub>2</sub> balanced. Dashed lines represent regenerations in 50 mL/min of air for 4 h. **b)** TGA of post-reaction 15wt% Cs<sub>2</sub>O/SiO<sub>2</sub> catalyst after ~50 h on stream. Condition: 45 mL min<sup>-1</sup> air, 5 mL min<sup>-1</sup> N<sub>2</sub>, 1 °C min<sup>-1</sup> ramp rate.

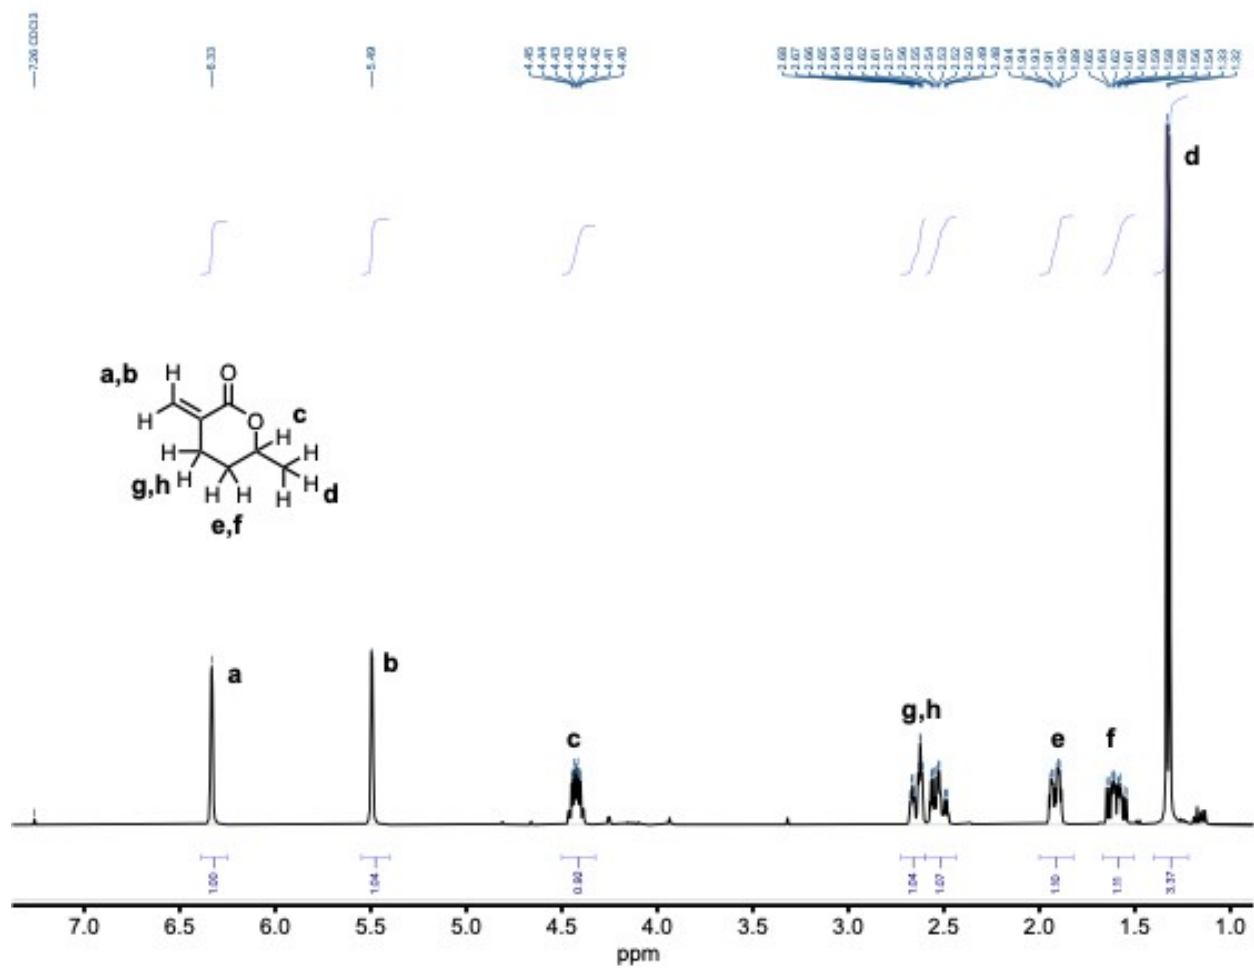

**Fig. S12**  $^1\text{H}$  NMR spectrum ( $\text{CDCl}_3$ , 23  $^\circ\text{C}$ ) of MCL obtained from the herein reported continuous synthetic method before polymerization.

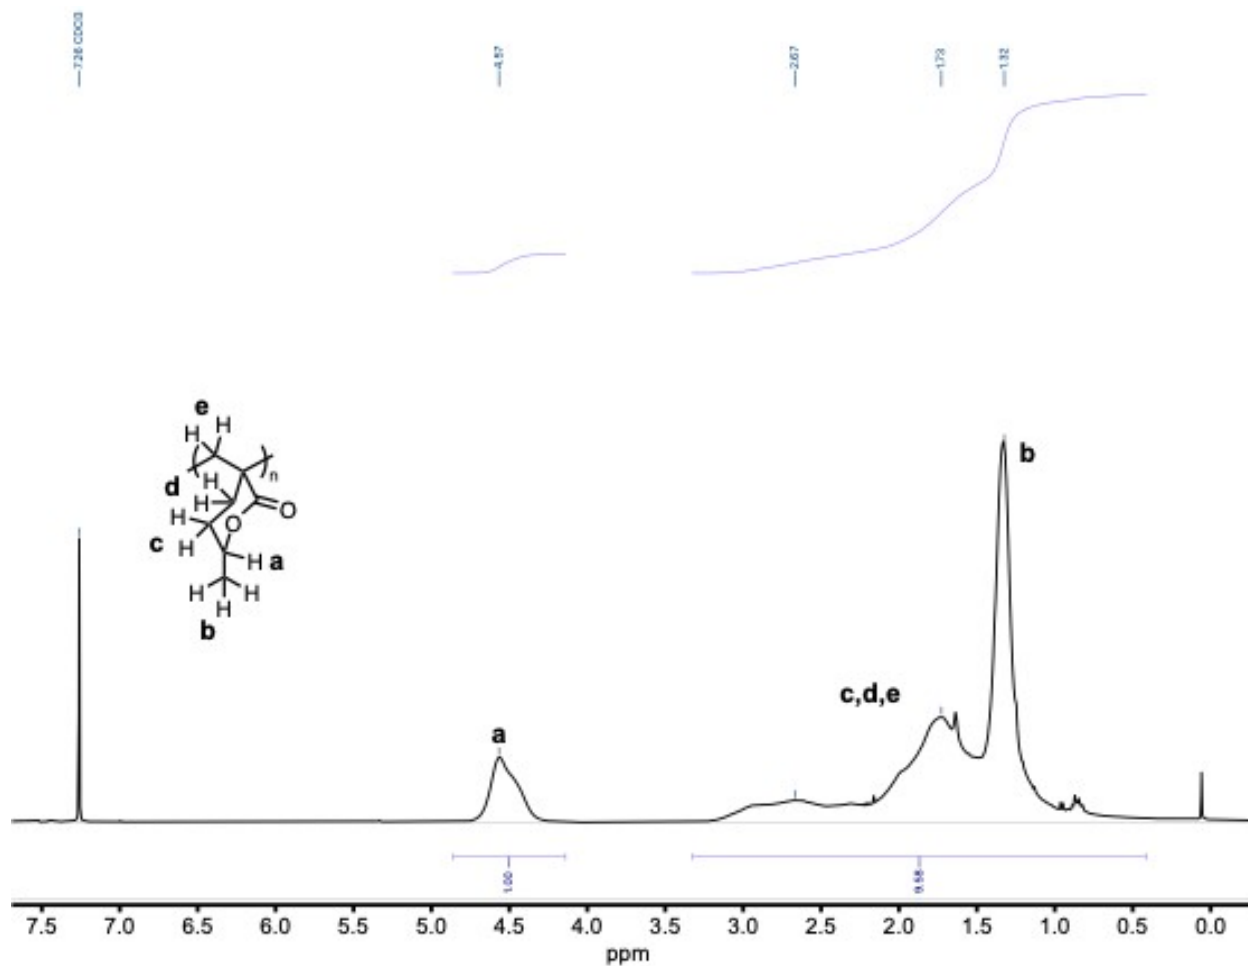

**Fig. S13**  $^1\text{H}$  NMR spectrum ( $\text{CDCl}_3$ , 23  $^\circ\text{C}$ ) of purified PMCL produced from a ratio of  $[\text{MCL}]:[\text{AIBN}] = 1000:1$  ( $M_n = 62.5$  kDa,  $D = 1.86$ ). Peak around 1.56 ppm corresponds with water and 0.87 ppm corresponds with grease.

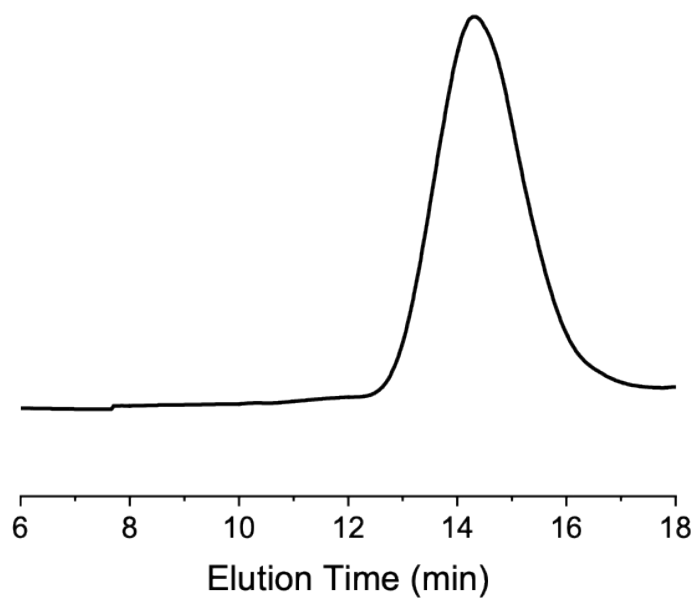

**Fig. S14** SEC trace of PMCL produced from a ratio of [MCL]:[AIBN] = 1000:1. ( $M_n = 62.5$  kDa,  $D = 1.86$ ).

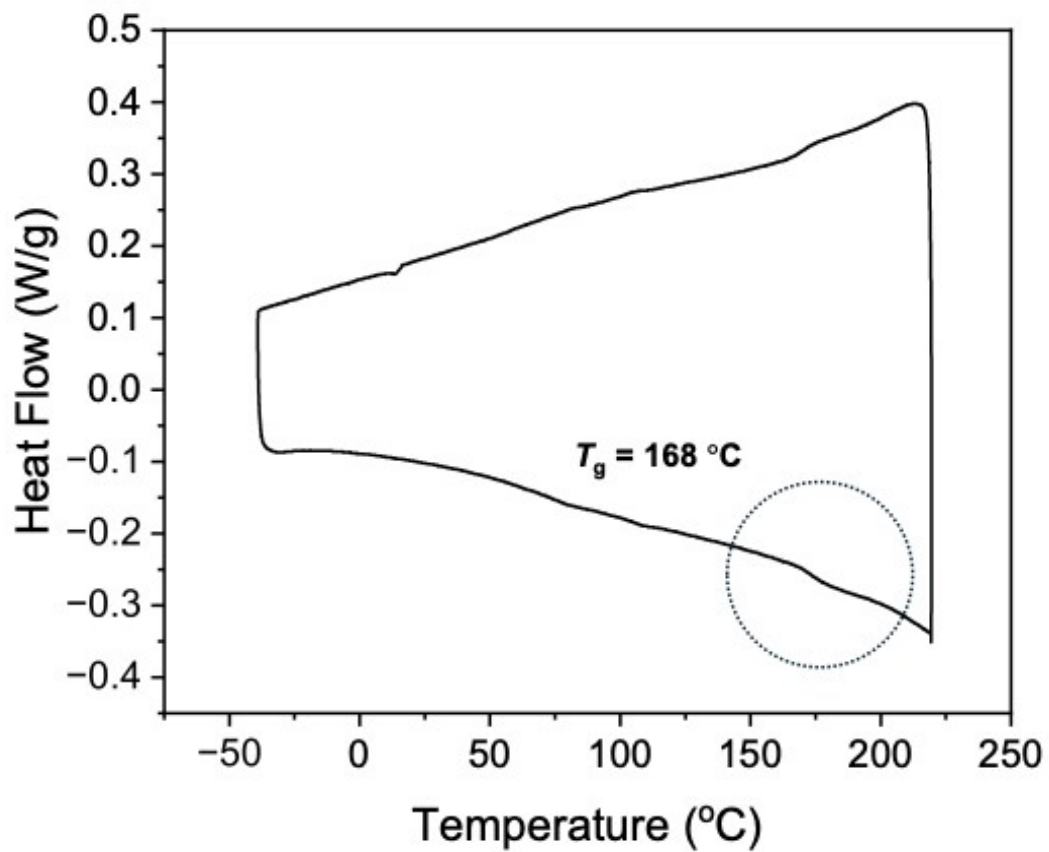

**Fig. S15** DSC curve of PMCL produced from a ratio of [MCL]:[AIBN] = 1000:1 ( $M_n = 62.5$  kDa,  $D = 1.86$ ).

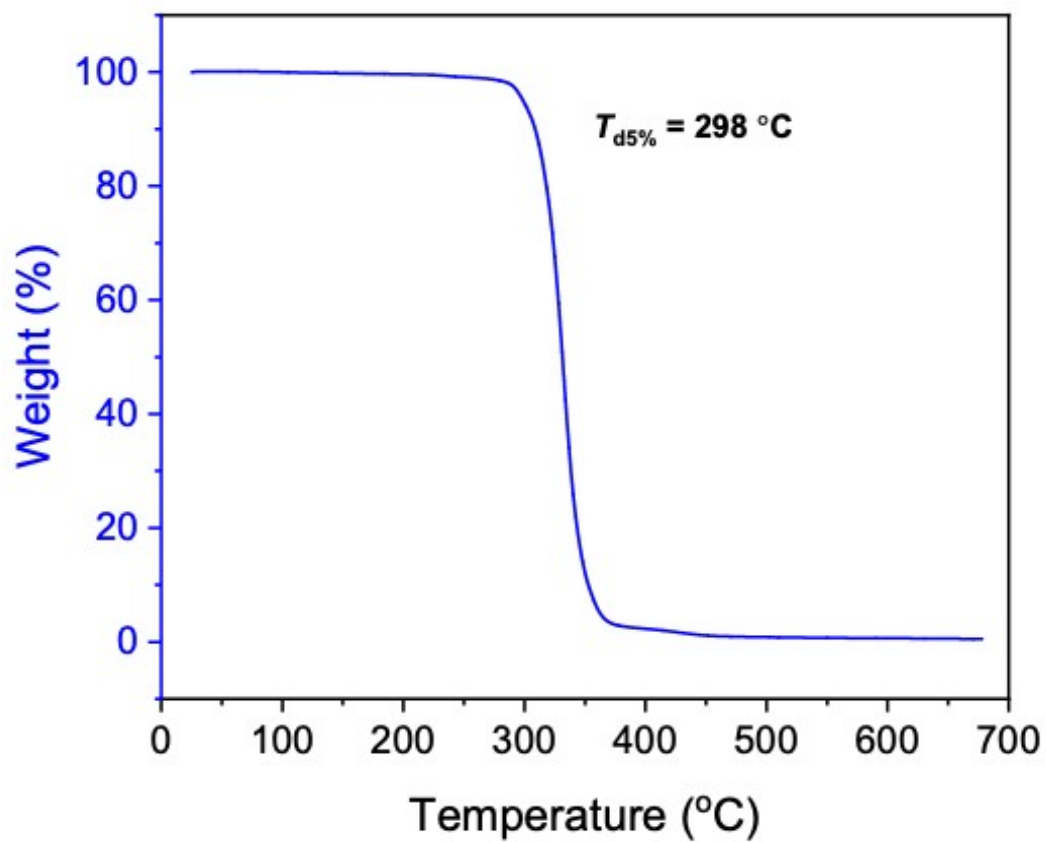

**Fig. S16** TGA curve of PMCL produced from a ratio of [MCL]:[AIBN] = 1000:1 ( $M_n = 62.5$  kDa,  $D = 1.86$ ).

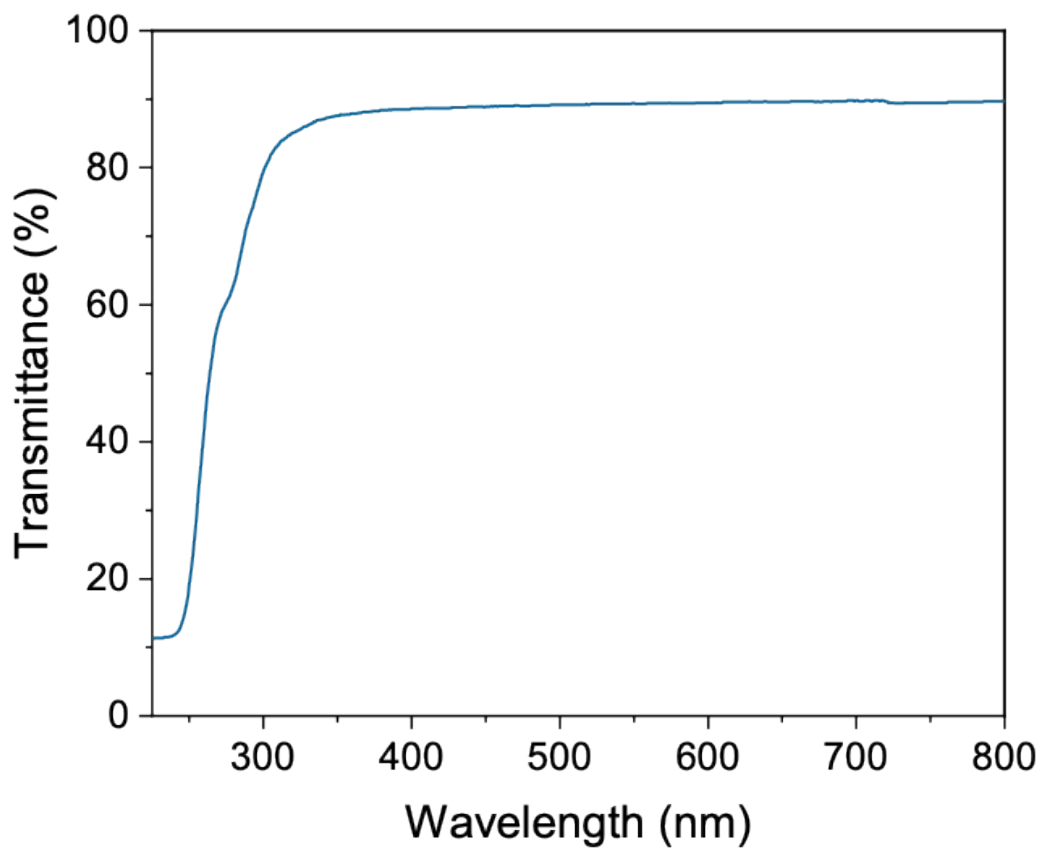

**Fig. S17** Optical transparency of PMCL produced from a ratio of [MCL]:[AIBN] = 1000:1 ( $M_n = 62.5$  kDa,  $D = 1.86$ ). Visible light region starts at 400 nm.

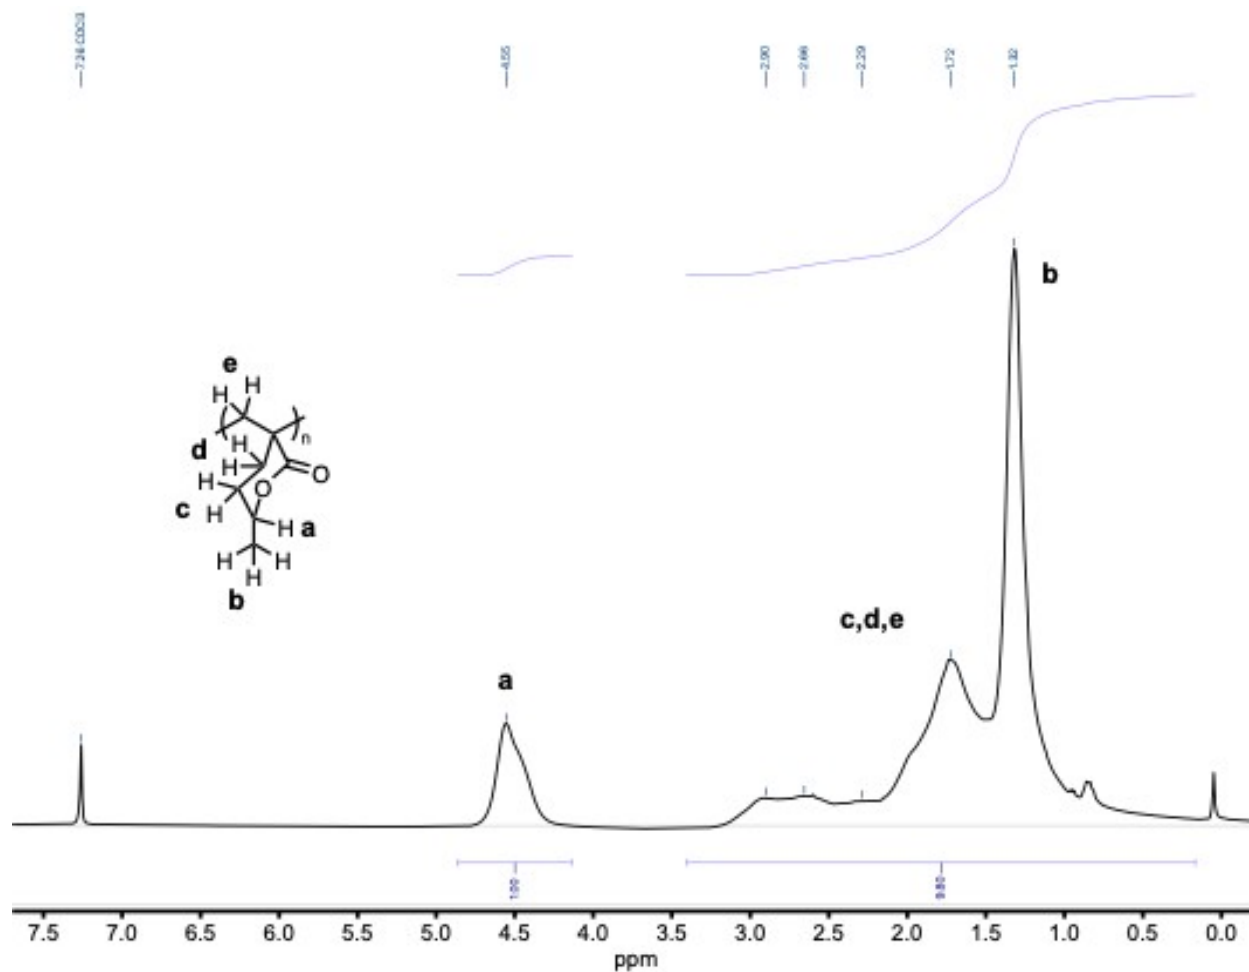

**Fig. S18**  $^1\text{H}$  NMR spectrum ( $\text{CDCl}_3$ , 23 °C) of purified PMCL produced from a ratio of  $[\text{MCL}]:[[\text{La}(\text{OBn})_3]_x] = 1000:1$  ( $M_n = 470$  kDa,  $D = 1.46$ ). Peak around 0.86 ppm corresponds with grease.

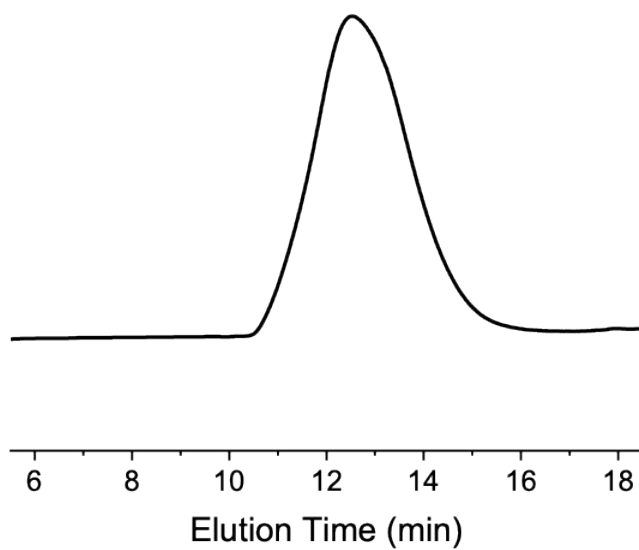

**Fig. S19** SEC trace of PMCL produced from a ratio of  $[\text{MCL}]:[[\text{La}(\text{OBn})_3]_x] = 1000:1$ . ( $M_n = 470$  kDa,  $D = 1.46$ ).

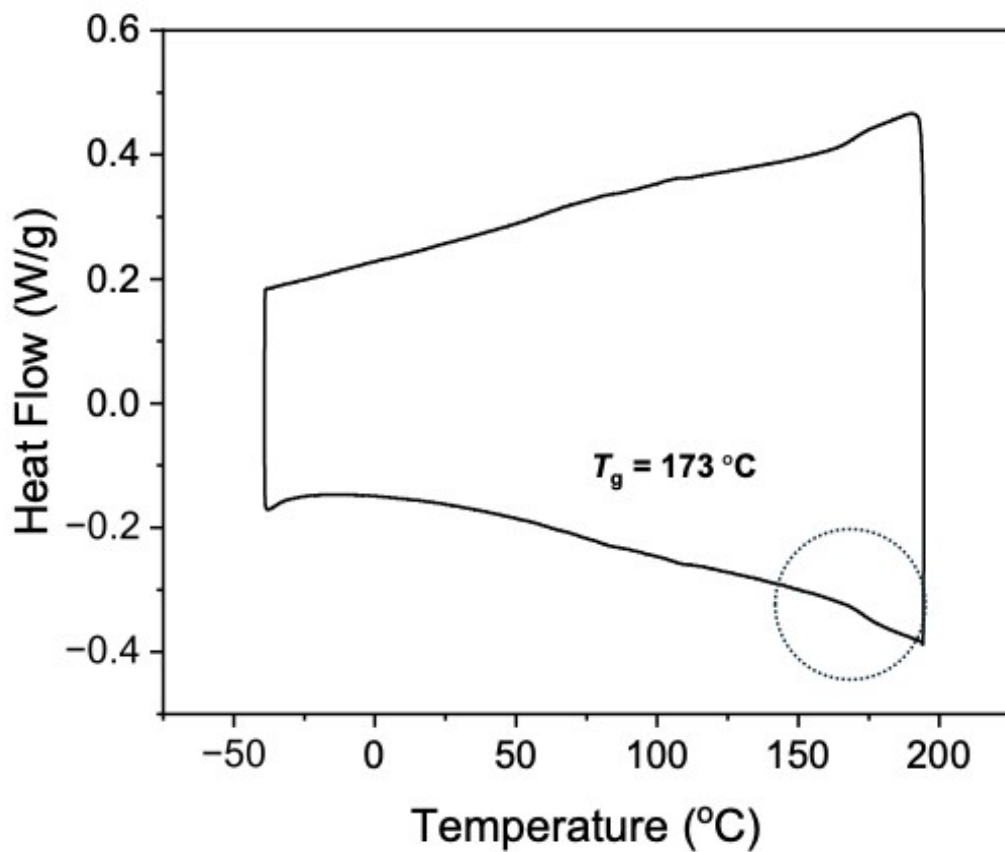

**Fig. S20** DSC curve of PMCL produced from a ratio of  $[\text{MCL}]:[[\text{La}(\text{OBn})_3]_x] = 1000:1$  ( $M_n = 470$  kDa,  $D = 1.46$ ).

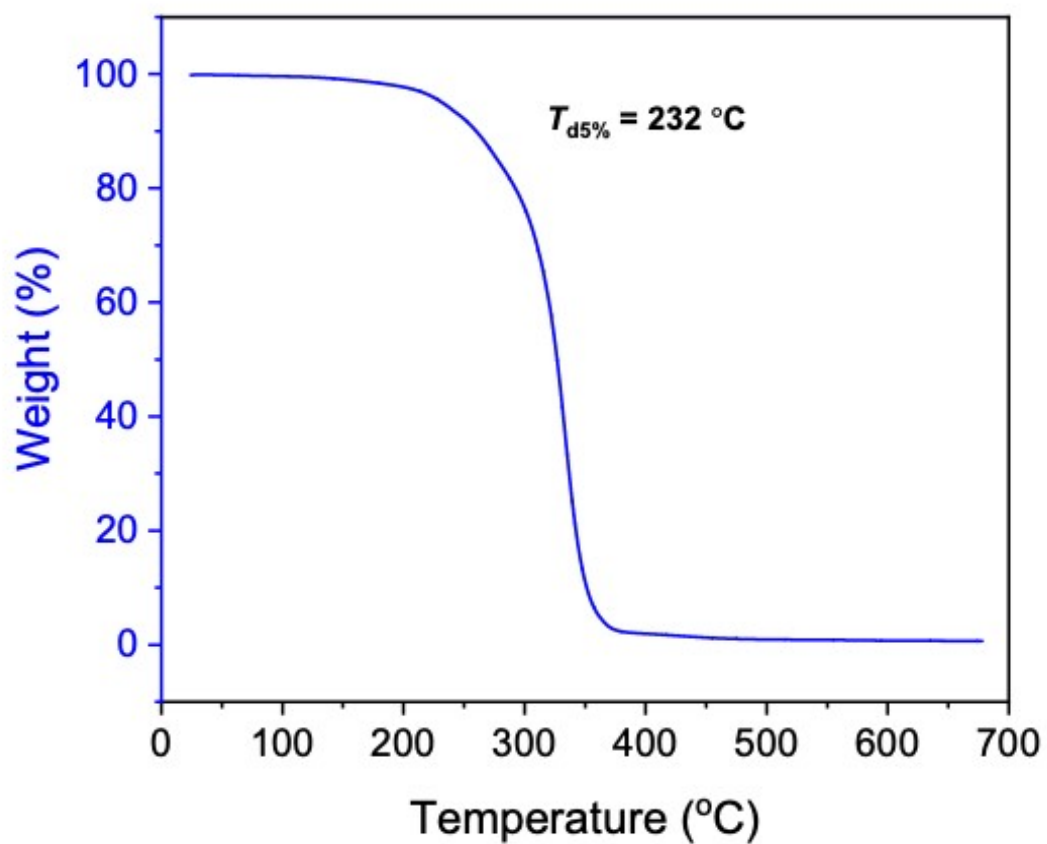

**Fig. S21** TGA curve of PMCL produced from a ratio of [MCL]:[[La(OBn)<sub>3</sub>]<sub>x</sub>] = 1000:1 ( $M_n = 470$  kDa,  $D = 1.46$ ).

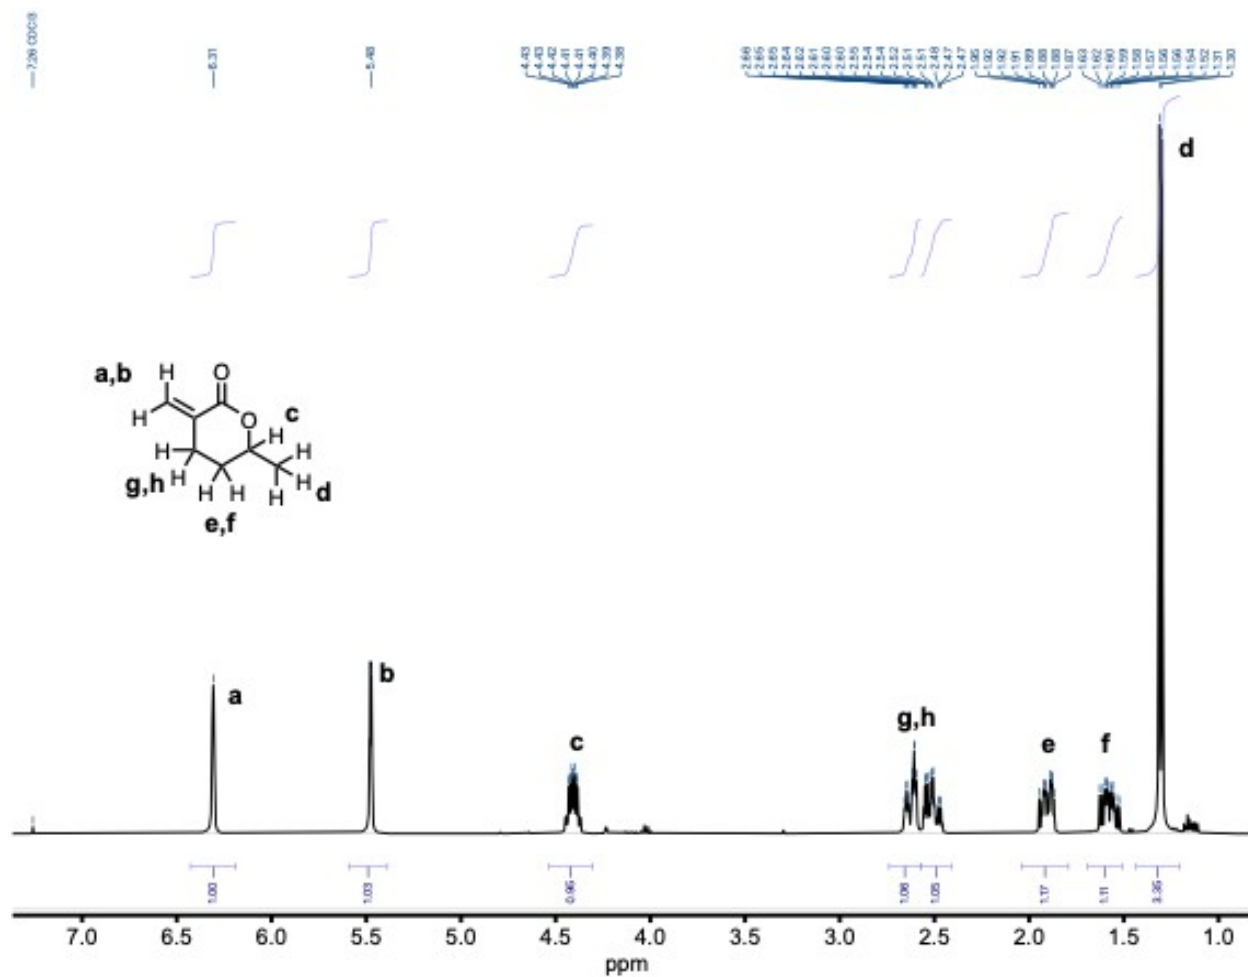

**Fig. S22** <sup>1</sup>H NMR spectrum (CDCl<sub>3</sub>, 23 °C) of MCL synthesized following the organic synthesis procedure as a reference for polymerization.

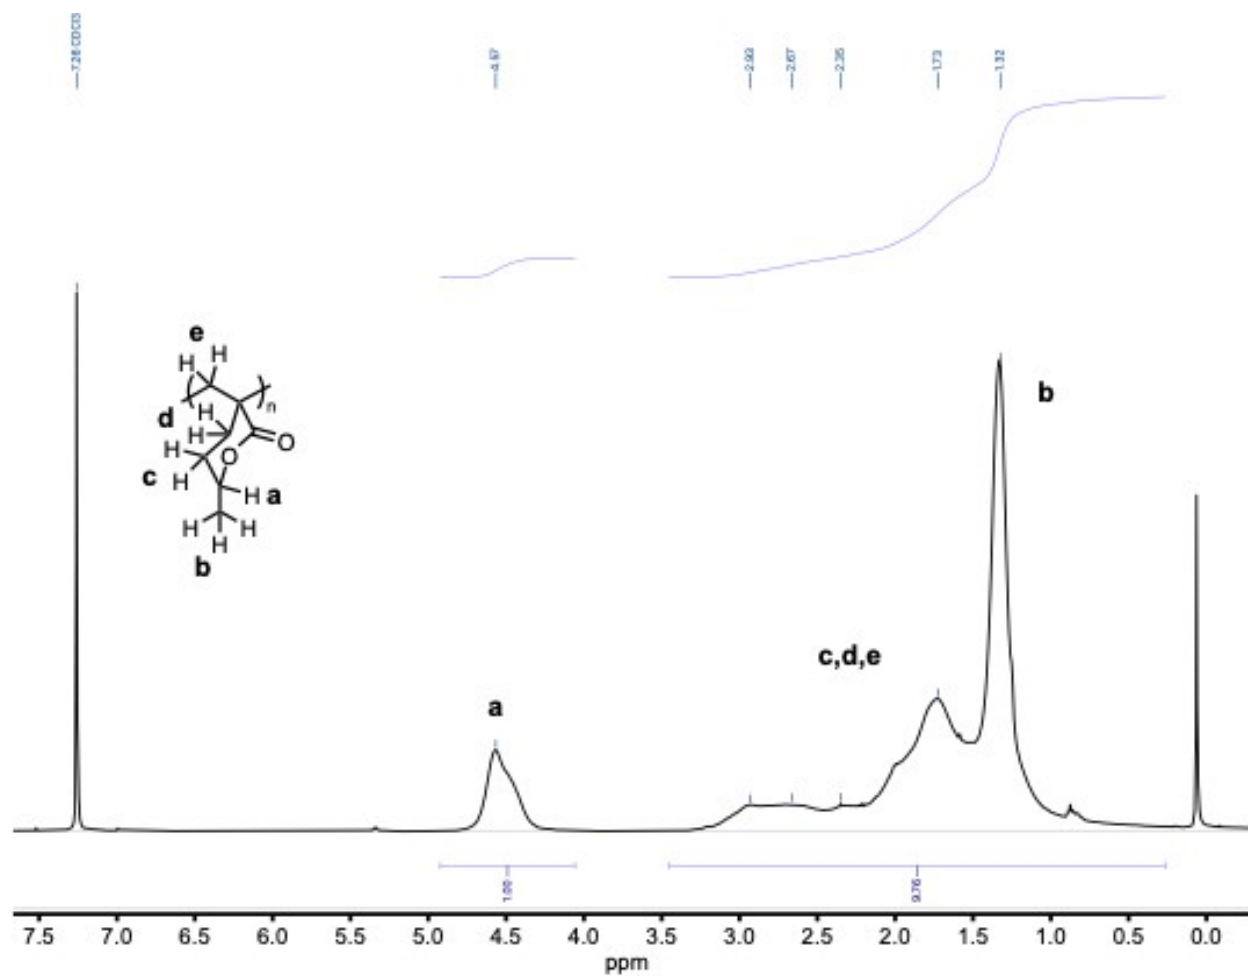

**Fig. S23**  $^1\text{H}$  NMR spectrum ( $\text{CDCl}_3$ , 23 °C) of purified PMCL produced from a ratio of  $[\text{MCL}]:[\text{AIBN}] = 1000:1$  ( $M_n = 65.5$  kDa,  $D = 1.96$ ) using MCL synthesized following the organic synthesis procedure.

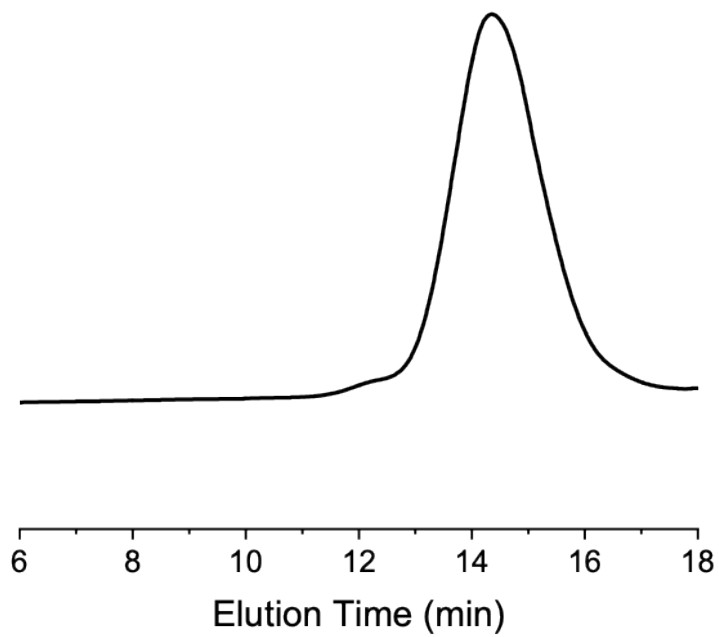

**Fig. S24** SEC trace of PMCL produced from a ratio of [MCL]:[AIBN] = 1000:1 ( $M_n = 65.5$  kDa,  $D = 1.96$ ) using MCL synthesized following the organic synthesis procedure.

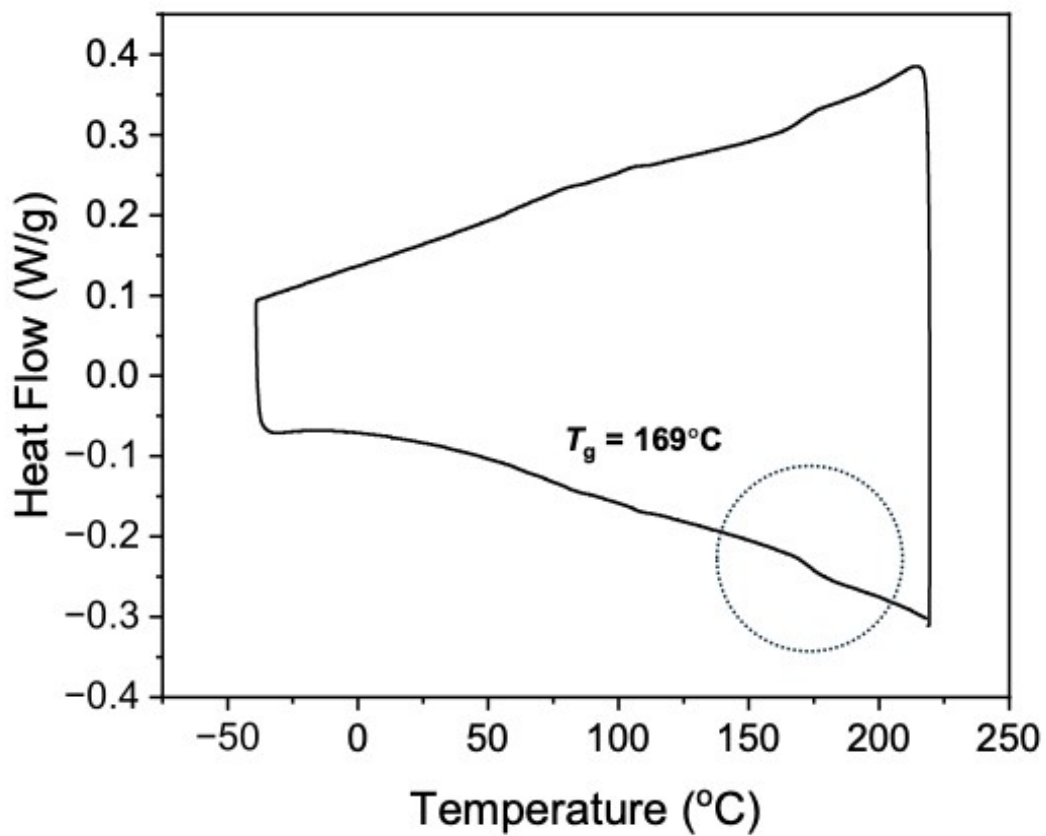

**Fig. S25** DSC curve of PMCL produced from a ratio of [MCL]:[AIBN] = 1000:1 ( $M_n = 65.5$  kDa,  $D = 1.96$ ) using MCL synthesized following the organic synthesis procedure.

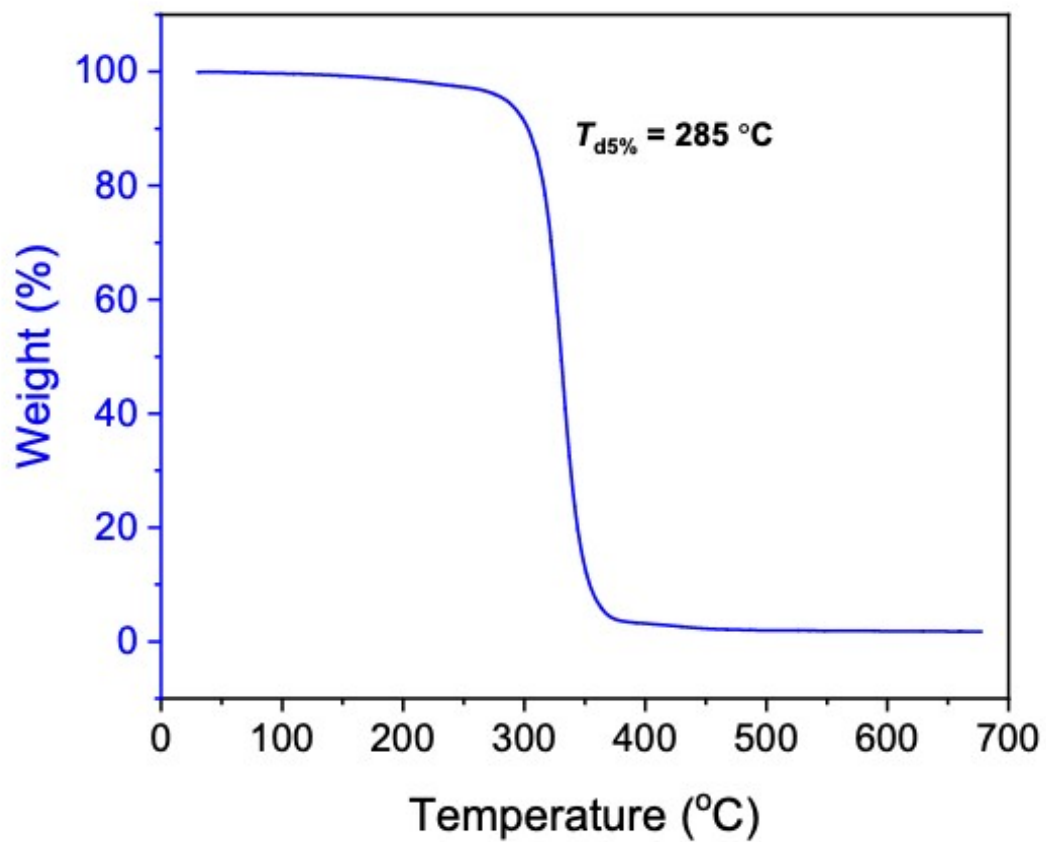

**Fig. S26** TGA curve of PMCL produced from a ratio of [MCL]:[AIBN] = 1000:1 ( $M_n = 65.5$  kDa,  $D = 1.96$ ) using MCL synthesized following the organic synthesis procedure.

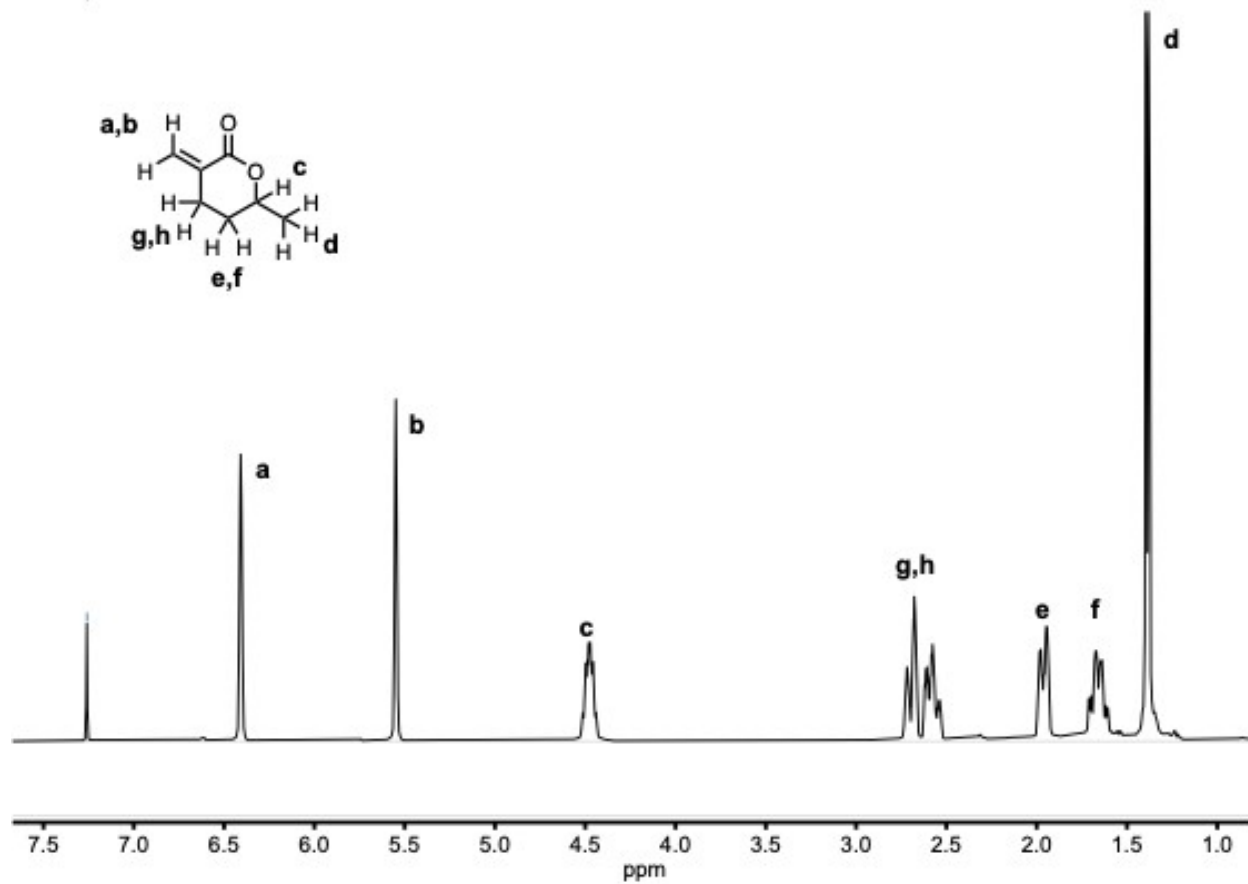

**Fig. S27** <sup>1</sup>H NMR (CDCl<sub>3</sub>, 23 °C) of pure MCL collected from reactive distillation experiment at 220 °C.

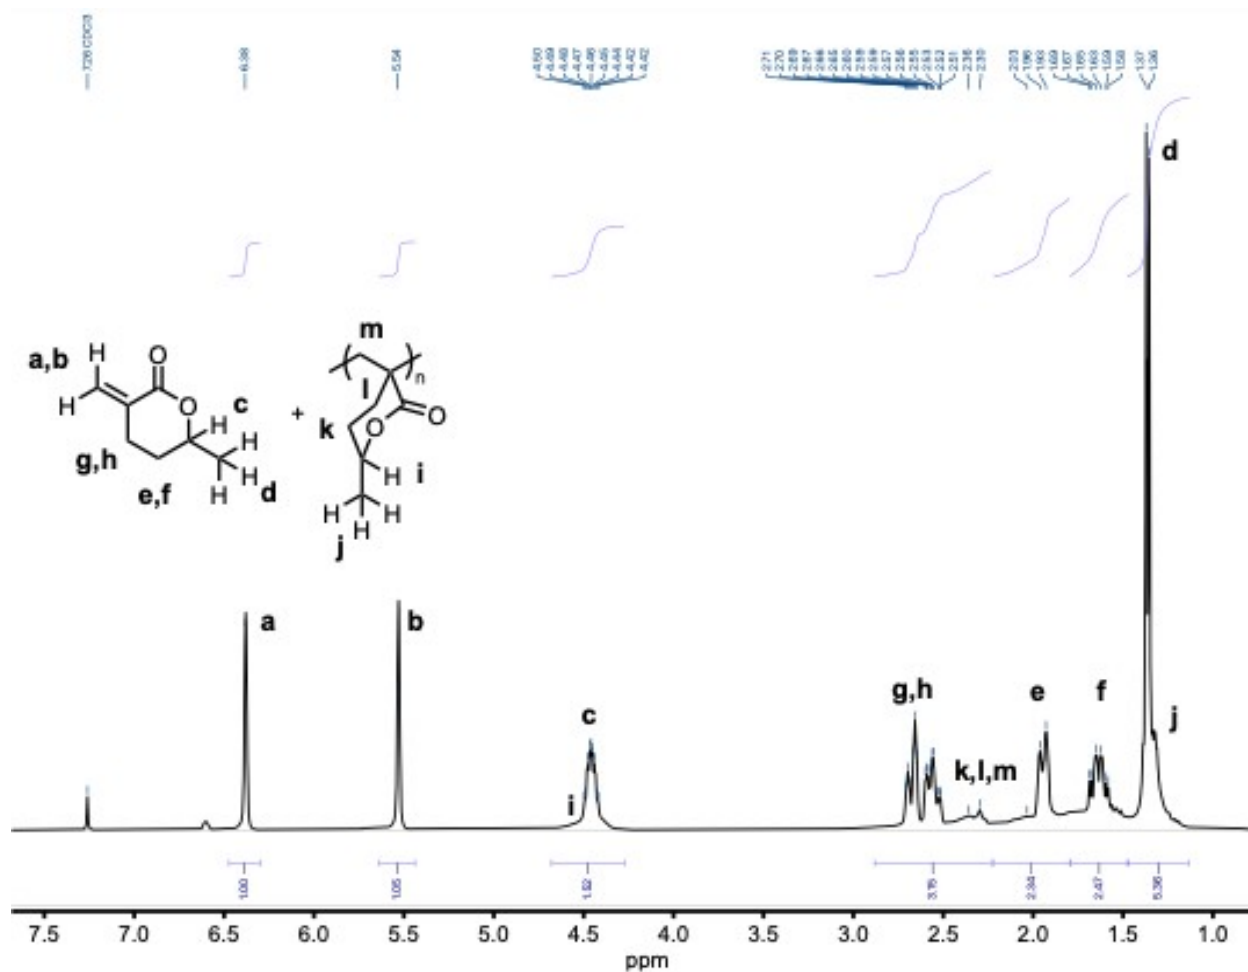

**Fig. S28**  $^1\text{H}$  NMR ( $\text{CDCl}_3$ , 23  $^\circ\text{C}$ ) of MCL and PMCL oligomers remaining in the reaction flask following depolymerization at 220  $^\circ\text{C}$  over 11 h. Some structural hydrogens are omitted for clarity. Monomer and polymer peaks overlap.
